# Supplementary material for: Heterostructure Ni3S4–MoS2 with interfacial electron redistribution used for enhancing hydrogen evolution
Source: Royal Society of Chemistry journal article supplement (doi:10.1039/d1ra02828f), 2021-01-01
Supplement: d1ra02828f1.pdf [file d1ra02828f1.pdf]

## Supporting Information

### **Heterostructure Ni<sub>3</sub>S<sub>4</sub>-MoS<sub>2</sub> with interfacial electron redistribution used for enhancing hydrogen evolution**

Jingmin Ge,<sup>a</sup> Jiaxing Jin,<sup>a</sup> Yanming Cao,<sup>a</sup> Meihong Jiang,<sup>a</sup> Fazhi Zhang,<sup>a</sup> Hongling

Guo,<sup>\*b</sup> Xiaodong Lei<sup>\*a</sup>

<sup>a</sup> State Key Laboratory of Chemical Resource Engineering, Beijing University of Chemical Technology, Beijing 100029, China. Tel: +86-10-64455357;

<sup>b</sup> Institute of Forensic Science, Ministry of Public Security, Beijing 100038, China

\*Corresponding author

E-mail: guohongling1234@163.com; leixd@mail.buct.edu.cn

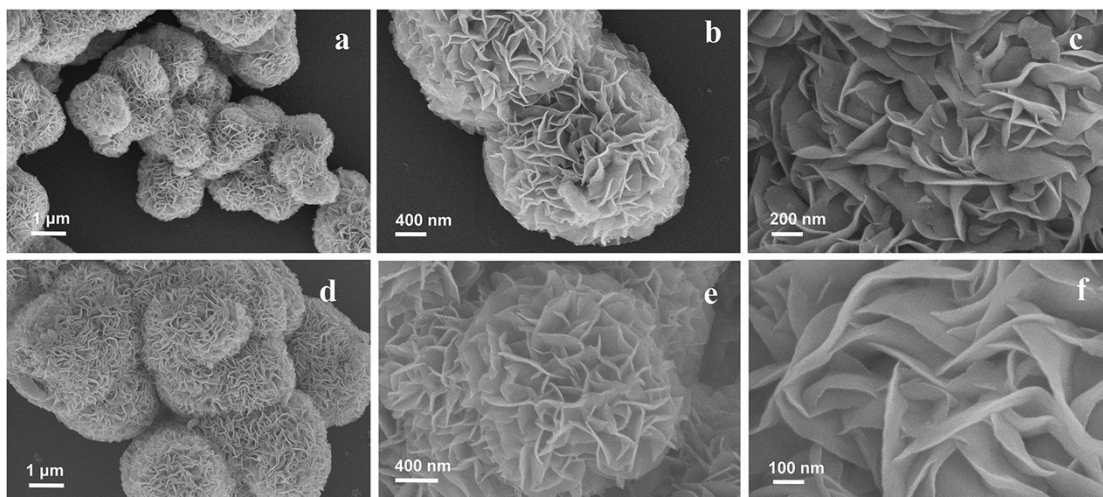

**Fig. S1.** (a-c) SEM images of pure MoS<sub>2</sub>. (d-e) SEM images of Ni<sub>3</sub>S<sub>4</sub>-MoS<sub>2</sub>.

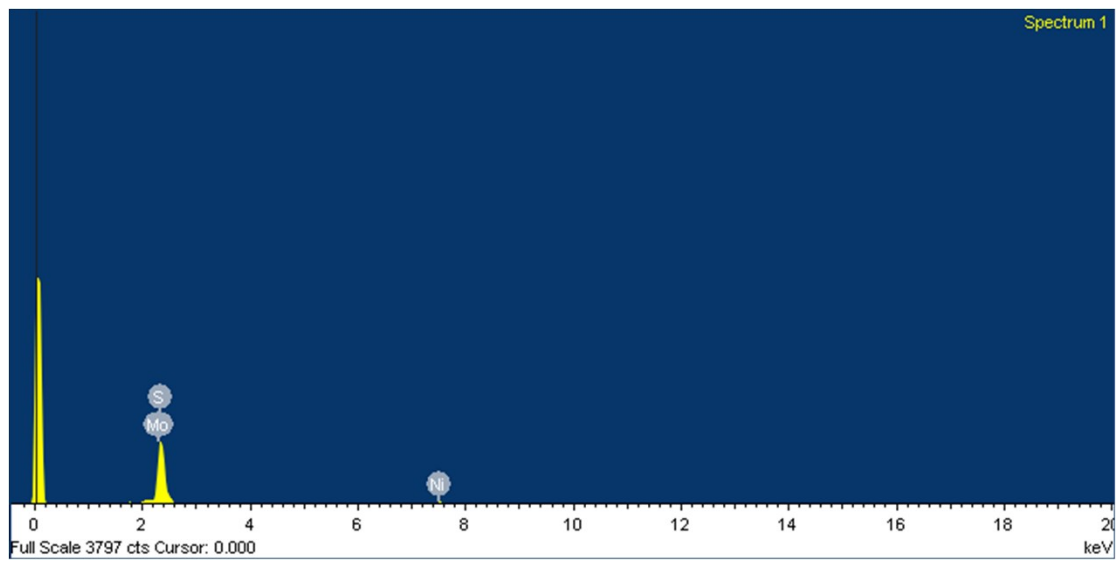

**Fig. S2.** EDS spectrum of Ni<sub>3</sub>S<sub>4</sub>-MoS<sub>2</sub>.

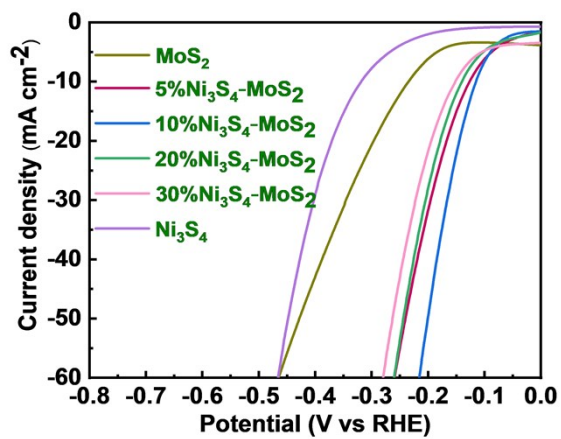

Fig. S3. LSV curves of Ni<sub>3</sub>S<sub>4</sub>-MoS<sub>2</sub> with different Ni contents in 1M KOH.

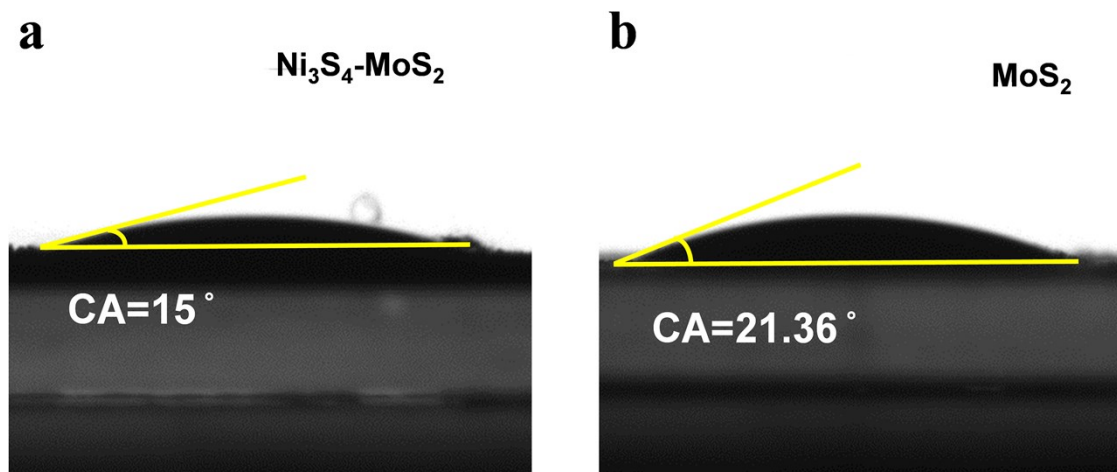

**Fig. S4.** Contact angles of  $\text{Ni}_3\text{S}_4\text{-MoS}_2$  (a) and  $\text{MoS}_2$  (b).

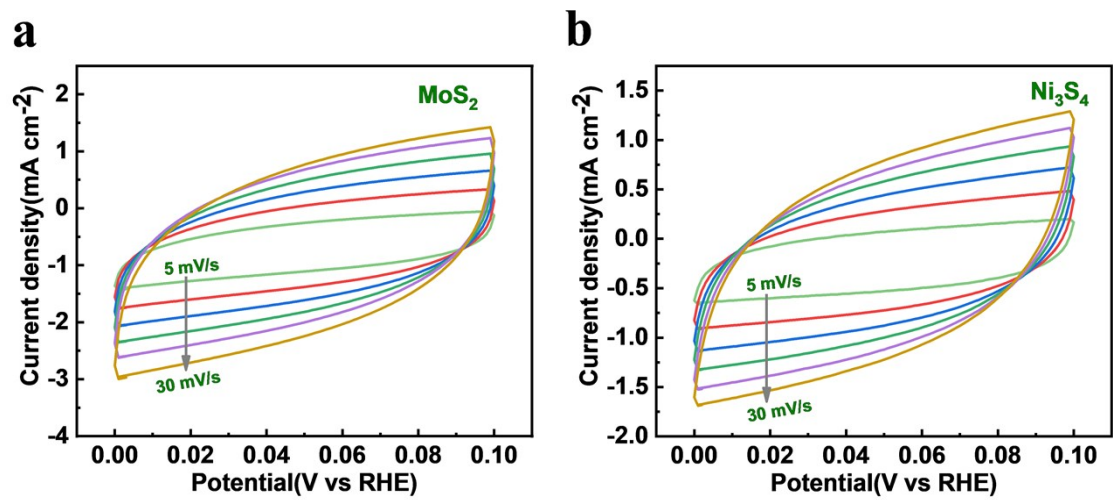

**Fig. S5.** CV curves of MoS<sub>2</sub> (a) and Ni<sub>3</sub>S<sub>4</sub> (b) at the scan rates of 5, 10, 15, 20, 25 and 30 mV s<sup>-1</sup> in 1.0 M KOH.

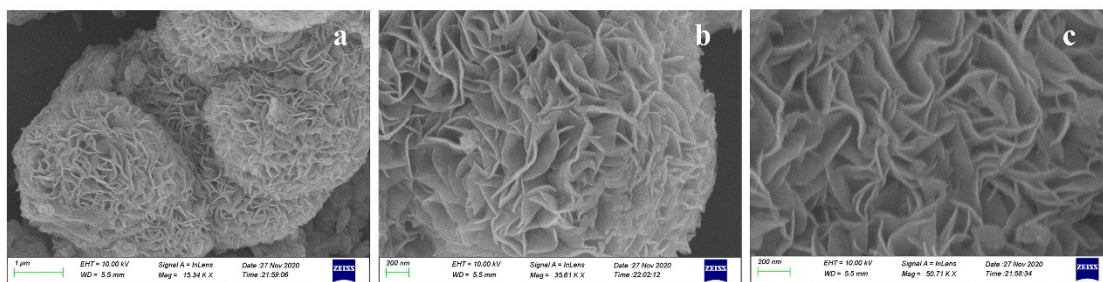

**Fig. S6.** (a and b) SEM images of  $\text{Ni}_3\text{S}_4\text{-MoS}_2$  after 3000 CV curves. (c) SEM image of  $\text{Ni}_3\text{S}_4\text{-MoS}_2$  after a stability test for 20 h.

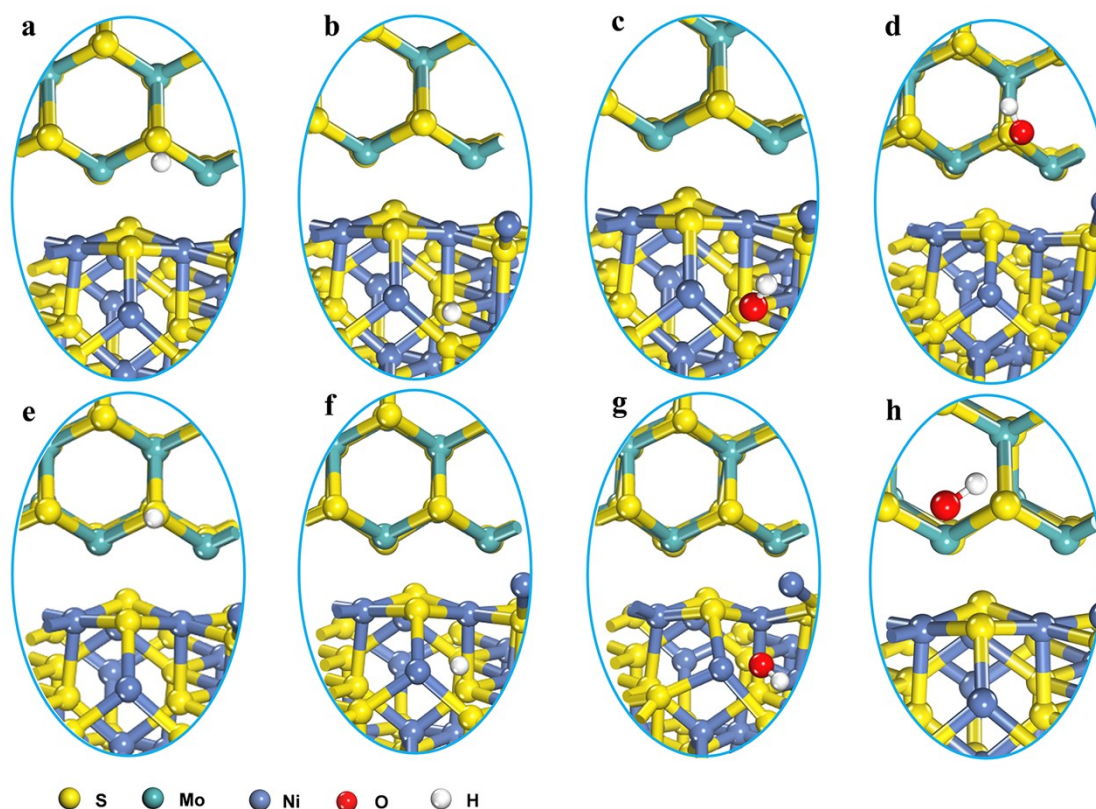

**Fig. S7.** Top-view of the initial structures for H adsorption on the (002) plane of MoS<sub>2</sub> (a) and the (311) plane of Ni<sub>3</sub>S<sub>4</sub> (b), and for OH adsorption on the (311) plane of Ni<sub>3</sub>S<sub>4</sub> (c) and the (002) plane of MoS<sub>2</sub> (d) in the heterostructure Ni<sub>3</sub>S<sub>4</sub>-MoS<sub>2</sub>. The optimized structures for H adsorption on the (002) plane of MoS<sub>2</sub> (e) and the (311) plane of Ni<sub>3</sub>S<sub>4</sub> (f), and for OH adsorption on the (311) plane of Ni<sub>3</sub>S<sub>4</sub> (g) and the (002) plane of MoS<sub>2</sub> (h) in the heterostructure Ni<sub>3</sub>S<sub>4</sub>-MoS<sub>2</sub>.



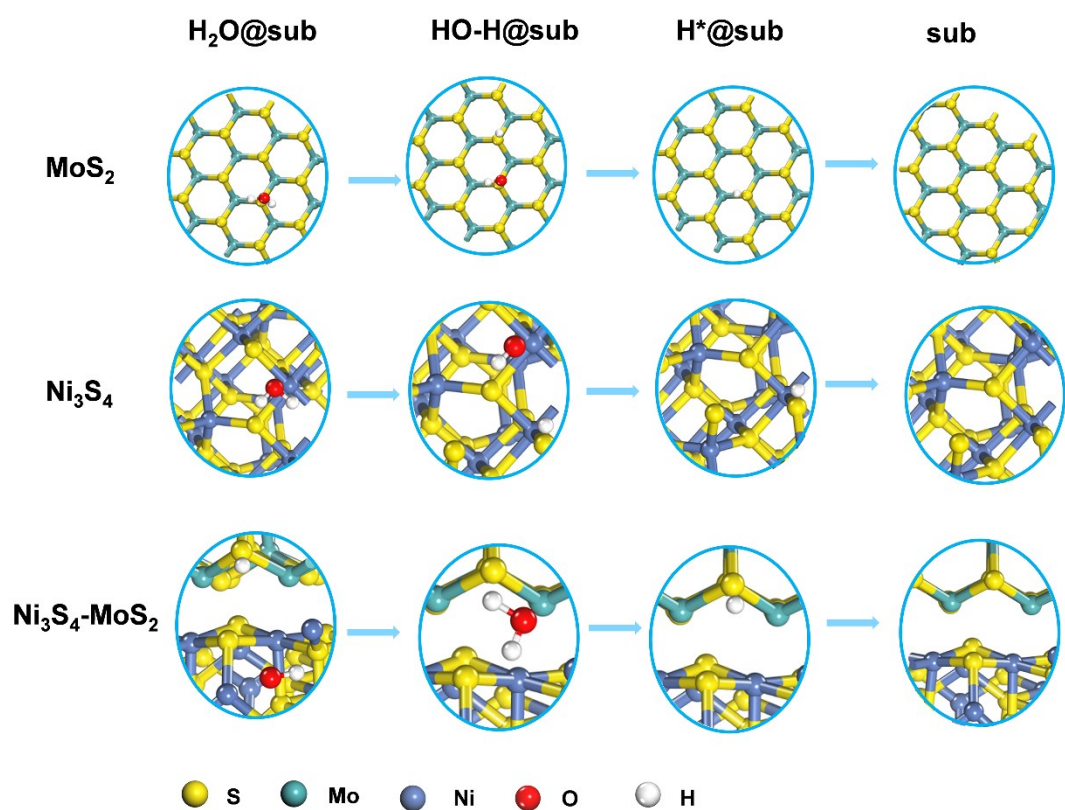

**Fig. S8.** HER reaction pathways and relevant structures of the most possible intermediate steps on the surface of  $\text{MoS}_2$ ,  $\text{Ni}_3\text{S}_4$  and  $\text{Ni}_3\text{S}_4\text{-MoS}_2$ , respectively.

**Table S1** Ni<sub>4</sub>S<sub>3</sub>-MoS<sub>2</sub> samples with different Ni contents.

| <b>Crystalline</b>                                  | <b>ICP-OES test results</b> |
|-----------------------------------------------------|-----------------------------|
| 5%Ni <sub>4</sub> S <sub>3</sub> -MoS <sub>2</sub>  | Ni 4.37 wt.%                |
| 10%Ni <sub>4</sub> S <sub>3</sub> -MoS <sub>2</sub> | Ni 7.7 wt.%                 |
| 20%Ni <sub>4</sub> S <sub>3</sub> -MoS <sub>2</sub> | Ni 14.2 wt.%                |
| 30%Ni <sub>4</sub> S <sub>3</sub> -MoS <sub>2</sub> | Ni 20.7 wt.%                |

**Table S2** The EDS quantitative analysis results of Ni<sub>3</sub>S<sub>4</sub>-MoS<sub>2</sub>.

| Element | Weight% | Atomic% |
|---------|---------|---------|
| S       | 55.75   | 77.26   |
| Ni      | 7.63    | 5.77    |
| Mo      | 36.63   | 16.96   |
| Totals  | 100.00  |         |

**Table S3** Bader charge analysis of Ni<sub>3</sub>S<sub>4</sub>-MoS<sub>2</sub>.

| Element | Bader Charge / e |
|---------|------------------|
| Mo-10   | 0.05             |
| Mo-20   | 0.02             |
| Ni-5    | -0.13            |
| Ni-8    | -0.27            |
| Ni-11   | -0.14            |
| Ni-17   | -0.06            |
| Ni-22   | -0.05            |
| S-15    | 0.21             |
| S-35    | 0.19             |
| S-41    | 0.16             |
| S-45    | 0.15             |

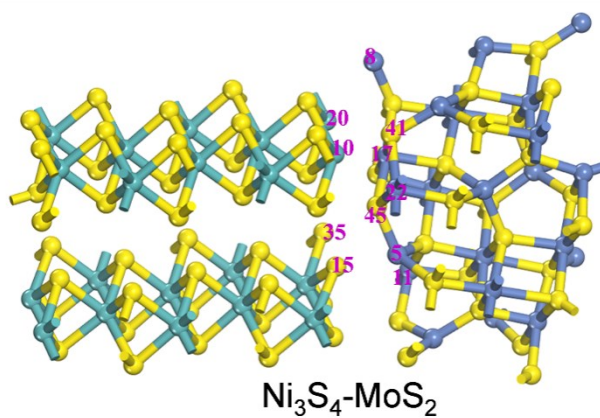

**Table S4** The adsorption free energy ( $\Delta E$ ) and Gibbs free energy ( $\Delta G$ ) of hydrogen generations and water dissociation during HER on the surface of MoS<sub>2</sub>, Ni<sub>3</sub>S<sub>4</sub> and Ni<sub>3</sub>S<sub>4</sub>-MoS<sub>2</sub>.

|                                                  | $\Delta E(\text{H}^*)/\text{eV}$ | $\Delta G(\text{H}^*)/\text{eV}$ | $\Delta E(\text{H}_2\text{O})/\text{eV}$ | $\Delta G(\text{H}_2\text{O})/\text{eV}$ |
|--------------------------------------------------|----------------------------------|----------------------------------|------------------------------------------|------------------------------------------|
| MoS <sub>2</sub>                                 | 1.69                             | 1.93                             | 3.73                                     | 4.18                                     |
| Ni <sub>3</sub> S <sub>4</sub>                   | -0.90                            | -0.66                            | 3.84                                     | 4.29                                     |
| Ni <sub>3</sub> S <sub>4</sub> -MoS <sub>2</sub> | -0.60                            | -0.36                            | -0.55                                    | -0.10                                    |

**Table S5** Summary of several representative recently reported HER electrocatalysts employed in acidic and alkaline electrolytes.

| Catalyst                                                | Electrolyte                             | $\eta_{10}$<br>(mV) | Tafel slope (mV<br>dec <sup>-1</sup> ) | Reference |
|---------------------------------------------------------|-----------------------------------------|---------------------|----------------------------------------|-----------|
| NiS <sub>2</sub> /MoS <sub>2</sub>                      | 1M KOH                                  | 235                 | 58                                     | [1]       |
| MoO <sub>3</sub> -MoS <sub>2</sub>                      | 0.5 M<br>H <sub>2</sub> SO <sub>4</sub> | 200                 | 74                                     | [2]       |
| MoP/MoS <sub>2</sub>                                    | 1M KOH                                  | 92                  | 59.8                                   | [3]       |
| Ni <sub>2</sub> P/MoS <sub>2</sub> /N:CNT               | 1M KOH                                  | 149                 | 60.22                                  | [4]       |
|                                                         | 0.5 M<br>H <sub>2</sub> SO <sub>4</sub> | 39.5                | 57.8                                   |           |
| Mo <sub>2</sub> N–Mo <sub>2</sub> C/HGr                 | 0.5 M<br>H <sub>2</sub> SO <sub>4</sub> | 154                 | 55                                     | [5]       |
|                                                         | 1M KOH                                  | 157                 | 68                                     |           |
| MoSSe@rGO                                               | 0.5 M<br>H <sub>2</sub> SO <sub>4</sub> | 135( $\eta_5$ )     | 51                                     | [6]       |
| (CoMo)S <sub>2</sub> /graphene                          | 0.5 M<br>H <sub>2</sub> SO <sub>4</sub> | 100                 | 60.8                                   | [7]       |
| Fe-MoS <sub>2</sub> /Ni <sub>3</sub> S <sub>2</sub> /NF | 1M KOH                                  | 130.6               | 112.7                                  | [8]       |
| Co <sub>3</sub> O <sub>4</sub> /MoS <sub>2</sub>        | 1M KOH                                  | 205                 | 98                                     | [9]       |
| MoS <sub>2</sub> /Ni <sub>3</sub> S <sub>2</sub>        | 1M KOH                                  | 110                 | 83.1                                   | [10]      |
| MoS <sub>2</sub> -Ni <sub>3</sub> S <sub>2</sub>        | 1M KOH                                  | 98                  | 61                                     | [11]      |
| Ni(OH) <sub>2</sub> /MoS <sub>2</sub>                   | 1M KOH                                  | 156                 | 56.4                                   | [12]      |
| MoS <sub>2</sub>  NiS MoO <sub>3</sub>                  | 1M KOH                                  | 95                  | 54.5                                   | [13]      |
| Ni-MoS <sub>2</sub> /CC                                 | 1M NaOH                                 | 107                 | 162                                    | [14]      |

---

|                                                  |                                         |      |      |                         |
|--------------------------------------------------|-----------------------------------------|------|------|-------------------------|
| Ni-MoS <sub>2</sub> /NCNTs                       | 0.5 M<br>H <sub>2</sub> SO <sub>4</sub> | 158  | 69.3 | [15]                    |
|                                                  | 1M KOH                                  | 179  | 62.3 |                         |
| MoS <sub>2</sub> /rGO                            | 0.5 M<br>H <sub>2</sub> SO <sub>4</sub> | 160  | 52   | [16]                    |
| MoS <sub>2</sub> /g-CN                           | 0.5 M<br>H <sub>2</sub> SO <sub>4</sub> | 141  | 57   | [17]                    |
| NC@MoS <sub>2</sub> /Ni-NC                       | 1M KOH                                  | 96.3 | 81.1 | [18]                    |
| CoS <sub>2</sub> -MoS <sub>2</sub>               | 1M KOH                                  | 130  | 66.8 | [19]                    |
| Ni <sub>3</sub> S <sub>4</sub> -MoS <sub>2</sub> | 1M KOH                                  | 116  | 81   | <b><i>This work</i></b> |

---

## References

1. P. Y. Kuang, T. Tong, K. Fan and J. G. Yu, In Situ Fabrication of Ni-Mo Bimetal Sulfide Hybrid as an Efficient Electrocatalyst for Hydrogen Evolution over a Wide pH Range, *Acs Catalysis*, 2017, **7**, 6179-6187.
2. X. Hou, A. Mensah, M. Zhao, Y. Cai and Q. Wei, Facile controlled synthesis of monodispersed MoO<sub>3</sub>-MoS<sub>2</sub> hybrid nanospheres for efficient hydrogen evolution reaction, *Applied Surface Science*, 2020, **529**, 147115.
3. Q. Liu, Z. Xue, B. Jia, Q. Liu, K. Liu, Y. Lin, M. Liu, Y. Li and G. Li, Hierarchical Nanorods of MoS<sub>2</sub>/MoP Heterojunction for Efficient Electrocatalytic Hydrogen Evolution Reaction, *Small*, 2020, **16**, e2002482.
4. M. Kim, M. A. R. Anjum, M. Lee, B. J. Lee and J. S. Lee, Activating MoS<sub>2</sub> Basal Plane with Ni<sub>2</sub>P Nanoparticles for Pt-Like Hydrogen Evolution Reaction in Acidic Media, *Advanced Functional Materials*, 2019, **29**, 1809151.
5. H. Yan, Y. Xie, Y. Jiao, A. Wu, C. Tian, X. Zhang, L. Wang and H. Fu, Holey Reduced Graphene Oxide Coupled with an Mo<sub>2</sub>N-Mo<sub>2</sub>C Heterojunction for Efficient Hydrogen Evolution, *Adv Mater*, 2018, **30**, 1704156.
6. B. Konkana, J. Masa, W. Xia, M. Muhler and W. Schuhmann, MoSSe@reduced graphene oxide nanocomposite heterostructures as efficient and stable electrocatalysts for the hydrogen evolution reaction, *Nano Energy*, 2016, **29**, 46-53.
7. L. X. Chen, Z. W. Chen, Y. Zhang, C. C. Yang and Q. Jiang, Insight into the excellent catalytic activity of (CoMo)S<sub>2</sub>/graphene for hydrogen evolution reaction,



- Applied Catalysis B: Environmental*, 2019, **258**, 118012.
8. J. Y. Xue, F. L. Li, Z. Y. Zhao, C. Li, C. Y. Ni, H. W. Gu, P. Braunstein, X. Q. Huang and J. P. Lang, A hierarchically-assembled Fe-MoS<sub>2</sub>/Ni<sub>3</sub>S<sub>2</sub>/nickel foam electrocatalyst for efficient water splitting, *Dalton Transactions*, 2019, **48**, 12186-12192.
  9. A. Muthurasu, V. Maruthapandian and H. Y. Kim, Metal-organic framework derived Co<sub>3</sub>O<sub>4</sub>/MoS<sub>2</sub> heterostructure for efficient bifunctional electrocatalysts for oxygen evolution reaction and hydrogen evolution reaction, *Applied Catalysis B-Environmental*, 2019, **248**, 202-210.
  10. J. Zhang, T. Wang, D. Pohl, B. Rellinghaus, R. H. Dong, S. H. Liu, X. D. Zhuang and X. L. Feng, Interface Engineering of MoS<sub>2</sub>/Ni<sub>3</sub>S<sub>2</sub> Heterostructures for Highly Enhanced Electrochemical Overall-Water-Splitting Activity, *Angewandte Chemie-International Edition*, 2016, **55**, 6702-6707.
  11. Y. Q. Yang, K. Zhang, H. L. Ling, X. Li, H. C. Chan, L. C. Yang and Q. S. Gao, MoS<sub>2</sub>-Ni<sub>3</sub>S<sub>2</sub> Heteronanorods as Efficient and Stable Bifunctional Electrocatalysts for Overall Water Splitting, *Acs Catalysis*, 2017, **7**, 2357-2366.
  12. Z. Y. He, Q. Y. Liu, Y. M. Zhu, T. Tan, L. X. Cao, S. J. Zhao and Y. Chen, Defect-Mediated Adsorption of Metal Ions for Constructing Ni Hydroxide/MoS<sub>2</sub> Heterostructures as High-Performance Water-Splitting Electrocatalysts, *Acs Applied Energy Materials*, 2020, **3**, 7039-7047.
  13. C. Wang, B. Tian, M. Wu and J. Wang, Revelation of the Excellent Intrinsic Activity of MoS<sub>2</sub>|NiS|MoO<sub>3</sub> Nanowires for Hydrogen Evolution Reaction in

- Alkaline Medium, *ACS Applied Materials & Interfaces*, 2017, **9**, 7084-7090.
14. Y. Li, L. X. Wang, A. L. Song, M. R. Xia, Z. P. Li and G. J. Shao, The study on the active origin of electrocatalytic water splitting using Ni-MoS<sub>2</sub> as example, *Electrochimica Acta*, 2018, **268**, 268-275.
  15. T. Dong, X. Zhang, P. Wang, H.-S. Chen and P. Yang, Formation of Ni-doped MoS<sub>2</sub> nanosheets on N-doped carbon nanotubes towards superior hydrogen evolution, *Electrochimica Acta*, 2020, **338**, 135885.
  16. Y. Wang, F. Lu, K. Su, N. Zhang, Y. Zhang, M. Wang and X. Wang, Engineering Mo-O-C interface in MoS<sub>2</sub>@rGO via charge transfer boosts hydrogen evolution, *Chemical Engineering Journal*, 2020, **399**, 126018.
  17. M. Q. Guan, C. Wang, S. Li, H. W. Du and Y. P. Yuan, Understanding the Enhanced Electrocatalytic Hydrogen Evolution via Integrating Electrochemically Inactive g-C<sub>3</sub>N<sub>4</sub>: The Effect of Interfacial Engineering, *Acs Sustainable Chemistry & Engineering*, 2020, **8**, 10313-10320.
  18. Q. Luo, C. Wang, H. Xin, Y. Qi, Y. Zhao, J. Sun and F. Ma, Hollow Sandwiched Structure of Ni-Modified MoS<sub>2</sub> Wrapped into Symmetrical N-Doped Carbon toward a Superior Hydrogen Evolution Electrocatalyst, *ACS Sustainable Chemistry & Engineering*, 2021, **9**, 732-742.
  19. Y. X. Zhou, W. Zhang, M. H. Zhang, X. X. Shen, Z. X. Zhang, X. D. Meng, X. S. Shen, X. H. Zeng and M. Zhou, Hetero-structured CoS<sub>2</sub>-MoS<sub>2</sub> hollow microspheres with robust catalytic activity for alkaline hydrogen evolution, *Applied Surface Science*, 2020, **527**, 146847.
